# Supplementary material for: Electrospun collagen core/poly-l-lactic acid shell nanofibers for prolonged release of hydrophilic drug
Source: Royal Society of Chemistry journal article supplement (doi:10.1039/d0ra08353d), 2021-01-01
Supplement: d0ra08353d1.pdf [file d0ra08353d1.pdf]

## **Supplementary materials**

### **Electrospun collagen core/poly-L-lactic acid shell nanofibers for prolonged release of hydrophilic drug**

**Wan-Ying Huang,<sup>a</sup> Toshiya Hibino,<sup>a</sup> Shin-ichiro Suye<sup>a,b</sup>  
and Satoshi Fujita<sup>a,b</sup>**

<sup>a</sup>Department of Frontier Fiber Technology and Science, Graduate School of Engineering, University of Fukui, Fukui, 910-8507, Japan

<sup>b</sup>Life Science Innovation Center, University of Fukui, Fukui, 910-8507, Japan

\*Corresponding author at: Department of Frontier Fiber Technology and Science, Graduate School of Engineering, University of Fukui, 3-9-1 Bunkyo, Fukui 910-8507, Japan

Tel/Fax: +81-776-27-9969, E-mail: fujitas@u-fukui.ac.jp

## Supplementary Materials and Methods

### Gel permeation chromatography (GPC)

The molecular weight of PLLA was measured using GPC. The analysis utilized a Shodex RI detector and a column (Shodex, LF-804, 8.0×300 mm, i.d.) at 40 °C, at a flow rate of 0.6 mL·min<sup>-1</sup> for 30 min with CHCl<sub>3</sub> (HPLC grade, filtered) as the eluent. The samples were dissolved in HPLC grade CHCl<sub>3</sub> to a concentration of 0.05w/v% and the solution was filtered (Millipore, SLLGH04NL, 0.2 μm) prior to GPC analysis. Polystyrene standards (Shodex) with low polydispersity were used to obtain a calibration curve.

### Cytotoxicity

The anti-cancer effect of released BC was evaluated by cell viability. The drug-loaded nanofiber was treated with oxygen plasma and immersed in PBS for 1 week. Subsequently, the sample was collected, lyophilized, dissolved in DMSO, and then centrifuged (100 rpm, 5 min). The supernatant was collected and diluted with PBS. The concentration of BC in the supernatant solution was determined by absorbance measurement. As a control, BC powder solution was dissolved in DMSO at the same concentration of the BC released (concentration range: 5 to 150 μg·mL<sup>-1</sup>). MDA-MB-231 cells, a mammary gland cancer cell line, were seeded onto a 96-well plate at 5×10<sup>3</sup> cells per 200 μL of Dulbecco's modified Eagle's medium (DMEM) supplemented with 10% FBS and 1% penicillin-streptomycin, and cultured at 37°C in a humidified atmosphere containing 5% CO<sub>2</sub> for 24 h. BC solution was serially diluted, and 10 μL of sample was added to each well of the 96-well plate that had cells. After 72 h of culture, the medium was replaced with 100 μL of PBS and added with 10 μL of cell count reagent SF for detecting live cells, and the mixture was kept at 37°C for 2 h. Lastly, the cell number was determined by measuring the absorbance at the wavelength of 450 nm in a microplate reader.

## Supplementary Results

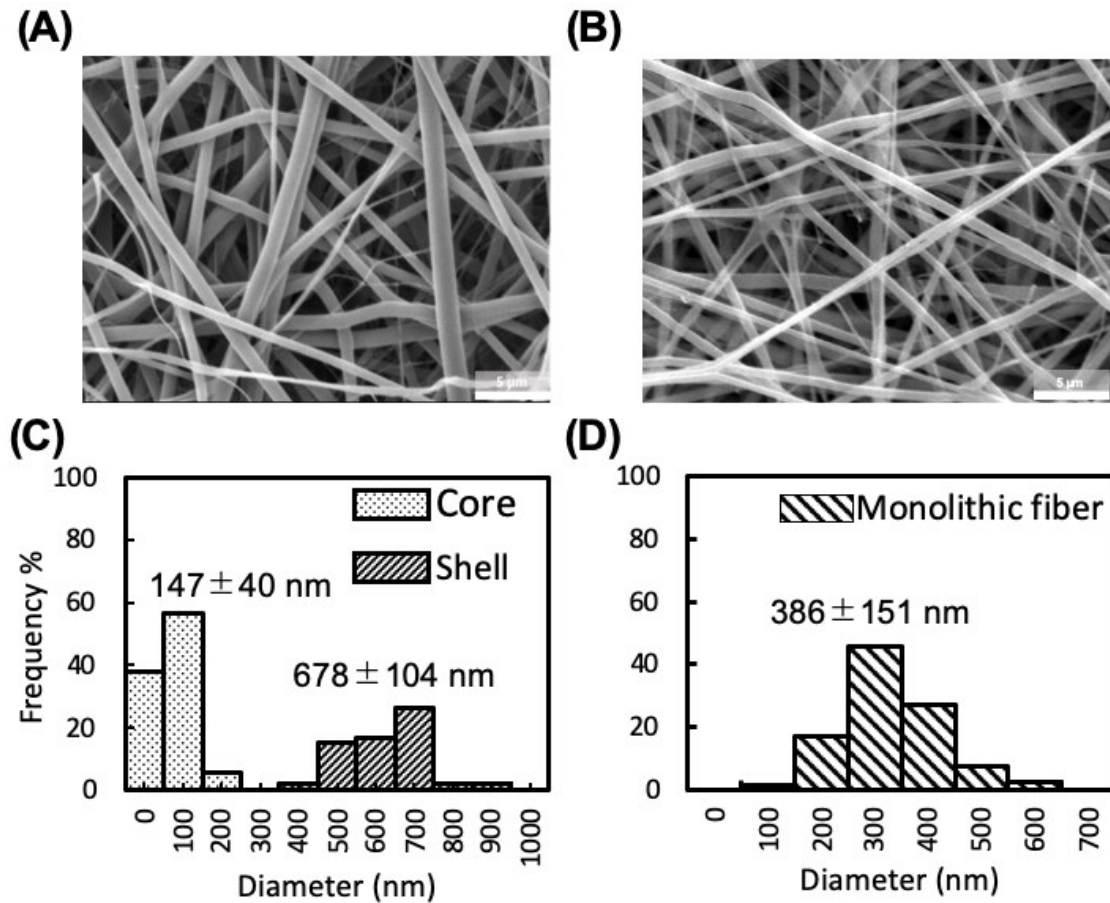

**Supplementary Figure S1** SEM images of (A) drug-loaded Col/PLLA core-shell nanofibers and (B) drug-loaded PLLA monolithic nanofibers. Bar = 5  $\mu\text{m}$ . Distribution of diameter of (C) Col/PLLA core-shell fibers and (D) PLLA monolithic fibers.

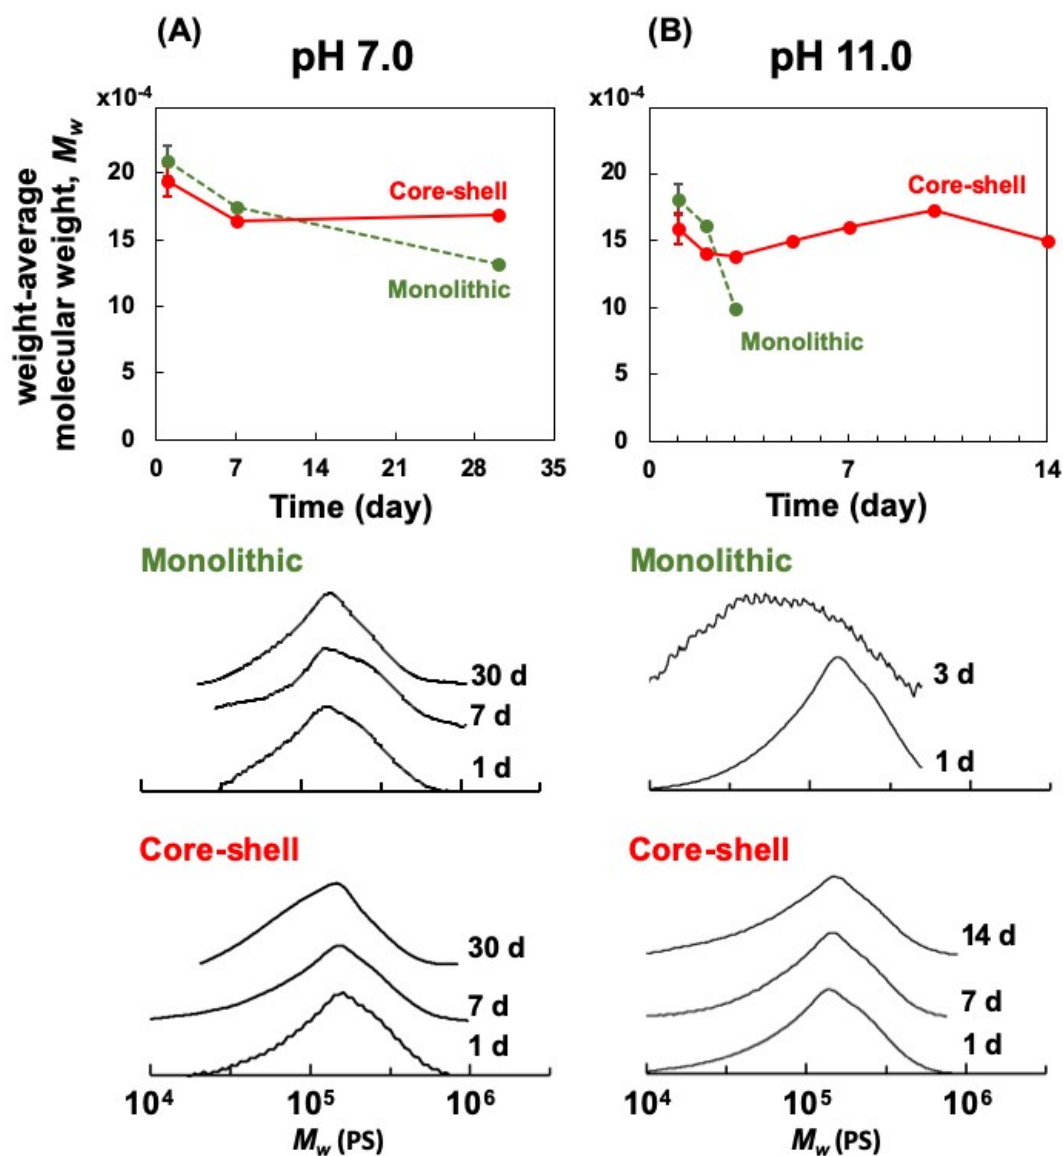

**Supplementary Figure S2** Degradation of matrix PLLA measured by molecular weight average under (A) physiological and (B) hydrolysis-accelerated conditions.

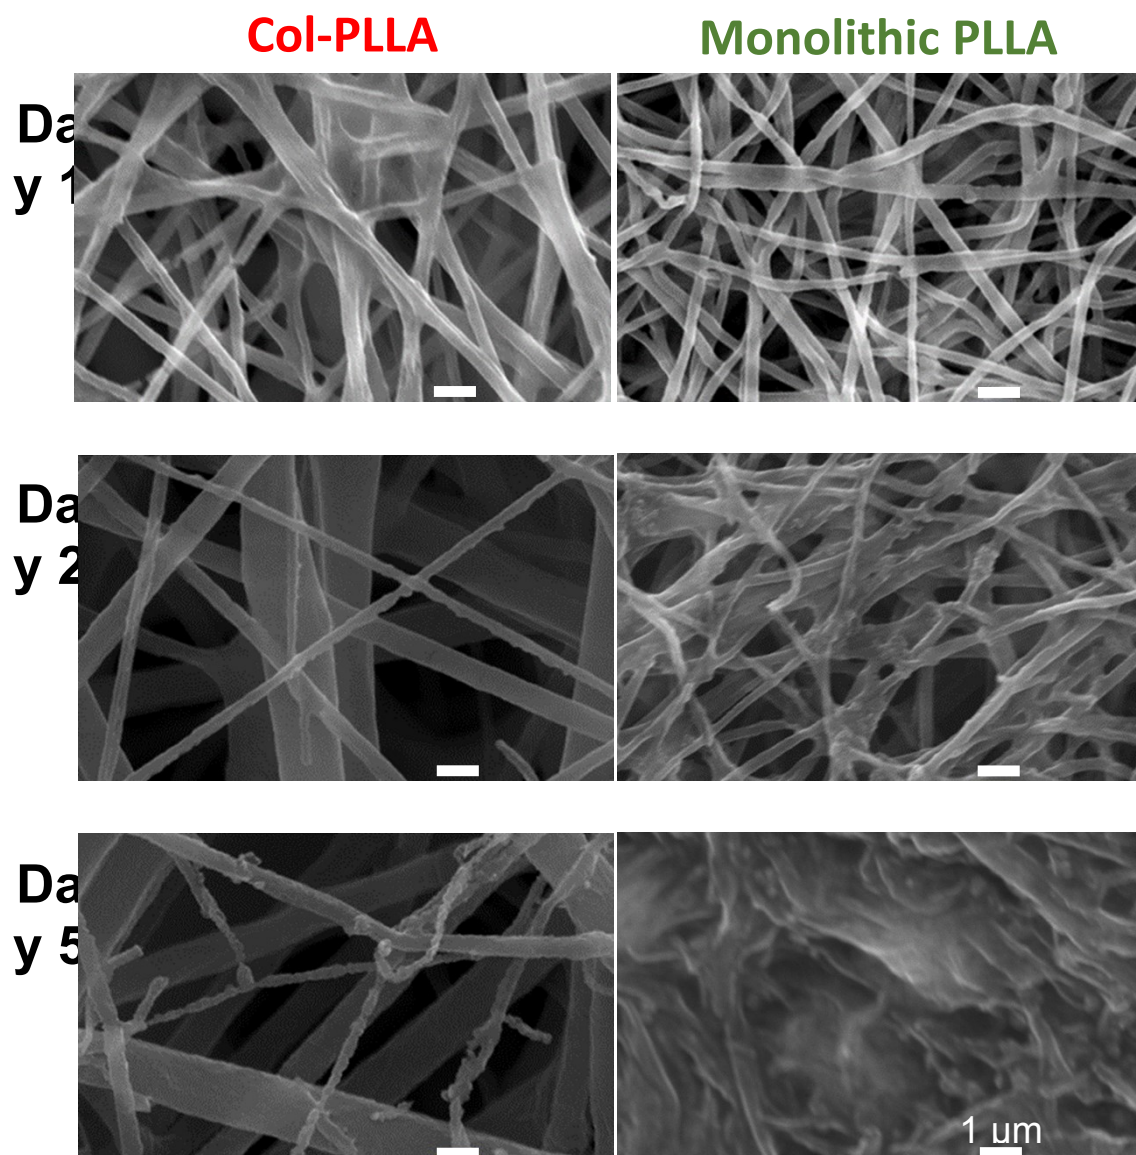

**Supplementary Figure S3** SEM images of nanofibers degraded under pH 11.0.

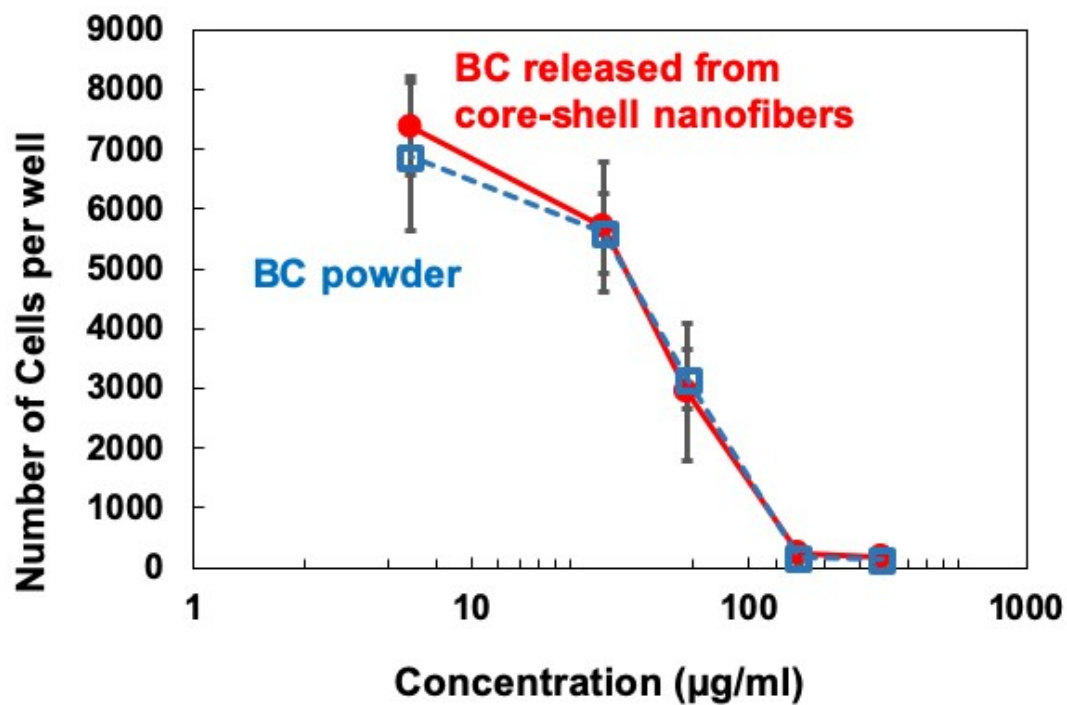

**Supplementary Figure S4** Cell viability after treatment with BC released from core-shell nanofibers (close circle) and the BC powder (open square) (means  $\pm$  SD,  $n = 6$ ).
